# Supplementary material
Source: MDPI journal article supplement (https://www.mdpi.com/2073-4433/9/7/277)
Supplement: s1 [file s1 › atmosphere-318471-SI.pdf]

## Supplementary Material

**Table S1.** Base information of the selected 18 main cities in Sichuan Basin. Location of the 18 main cities are presented in Figure 1b.

| City-level            | City           |
|-----------------------|----------------|
| Megacity              | Chengdu (CD)   |
|                       | Chongqing (CQ) |
| Prefecture-level city | Mianyang (MY)  |
|                       | Deyang (DY)    |
|                       | Ya'an (YA)     |
|                       | Meishan (MS)   |
|                       | Ziyang (ZY)    |
|                       | Leshan (LS)    |
|                       | Neijiang (NJ)  |
|                       | Zigong (ZG)    |
|                       | Yibin (YB)     |
|                       | Guangyuan (GY) |
|                       | Bazhong (BZ)   |
|                       | Dazhou (DZ)    |
|                       | Suining (SN)   |
|                       | Nanchong (NC)  |
|                       | Guangan (GA)   |
|                       | Luzhou (LZ)    |

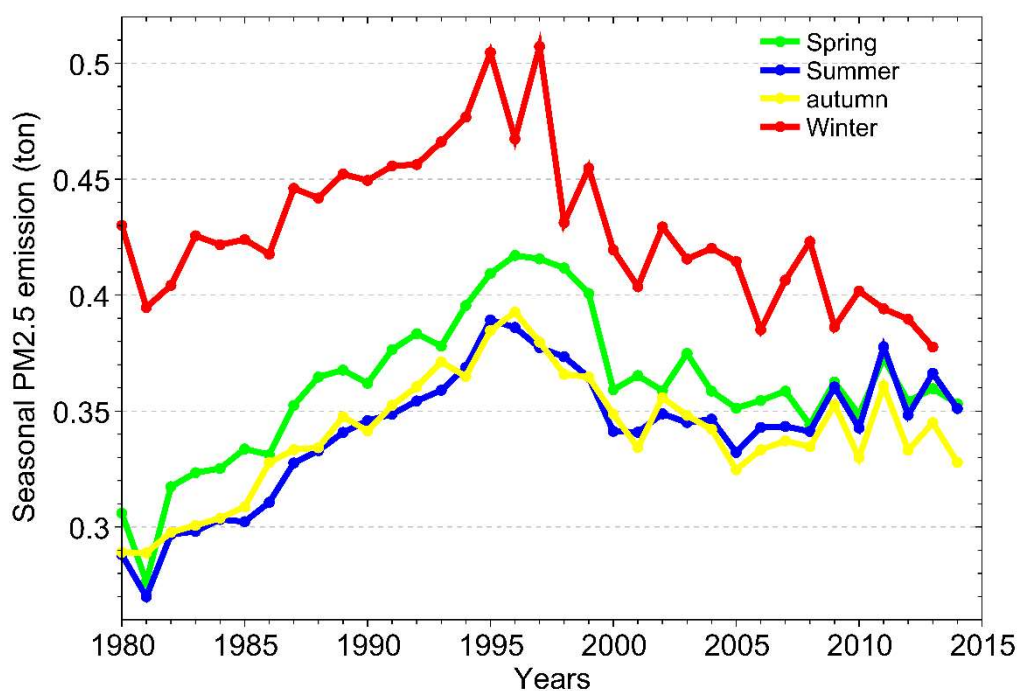

**Figure S1.** Seasonal variation in total anthropogenic emissions of PM<sub>2.5</sub> (unit: ton) averaged over Sichuan-Chongqing region for 1980–2014, derived from PKU emission inventory.

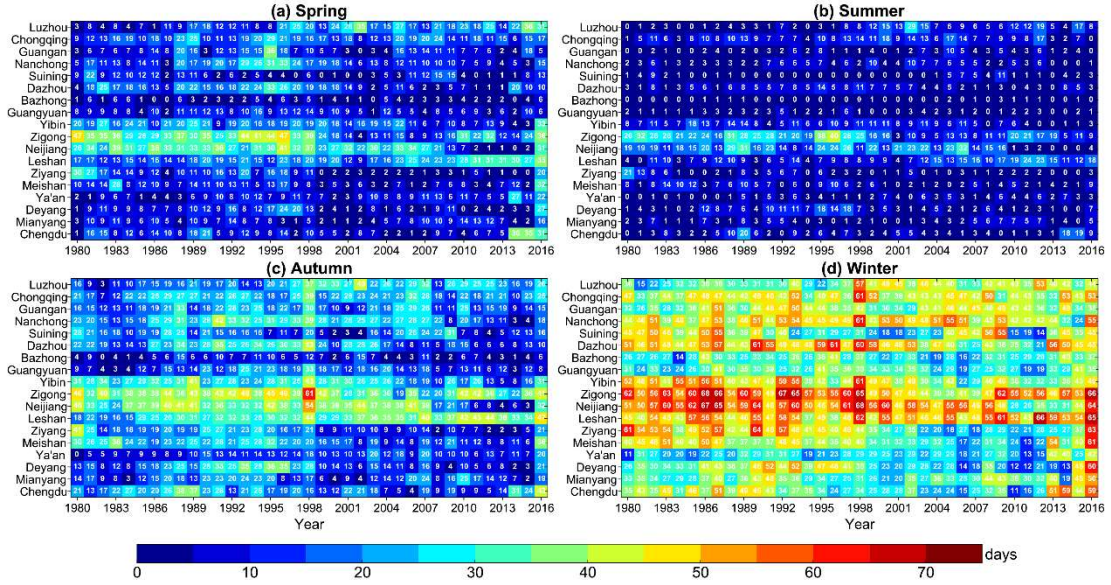

**Figure S2.** Seasonal number of haze days in 18 main cities of the SCB from 1980 to 2016.

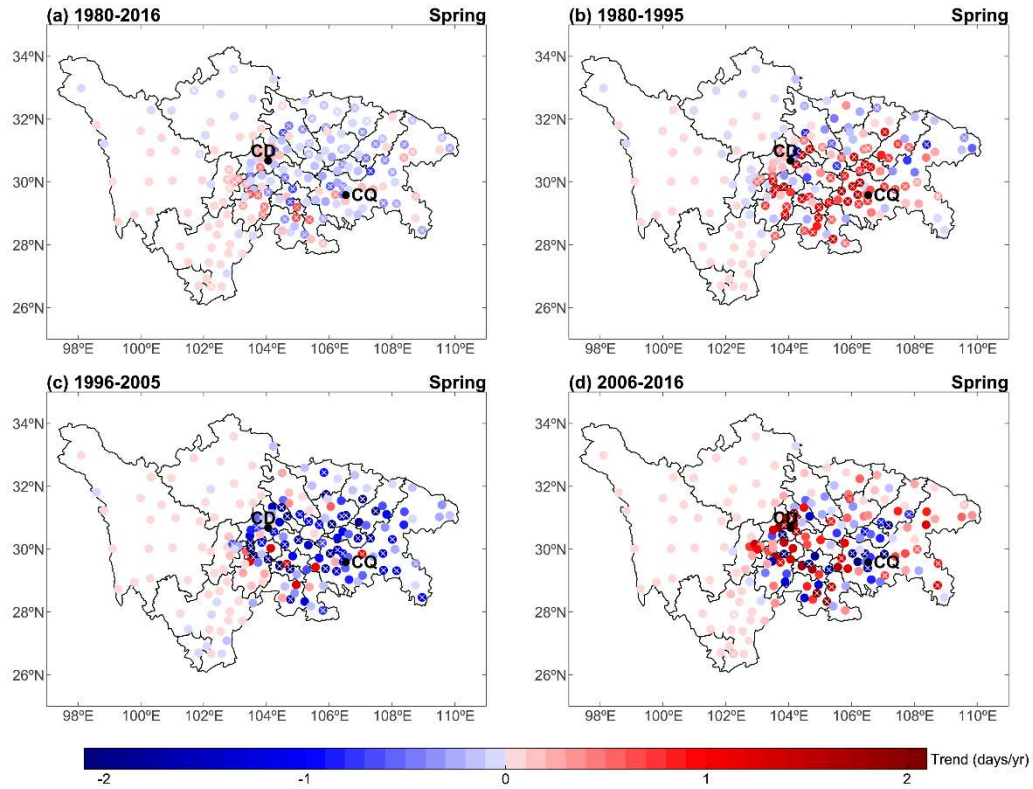

**Figure S3.** Linear trend of station spring haze days in the four periods: (a) 1980–2016, (b) 1980–1995, (c) 1996–2005, and (d) 2006–2016. The circle with a cross means trend above 95% significance level.

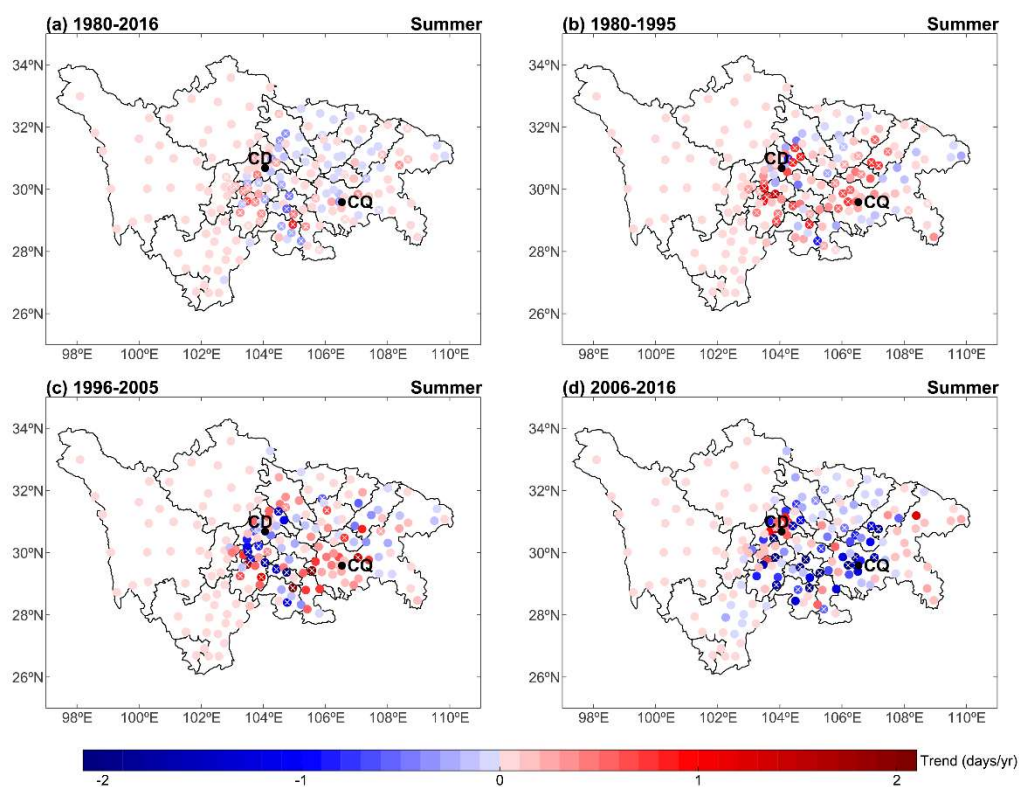

Figure S4. Same as Figure S3, but for summer.

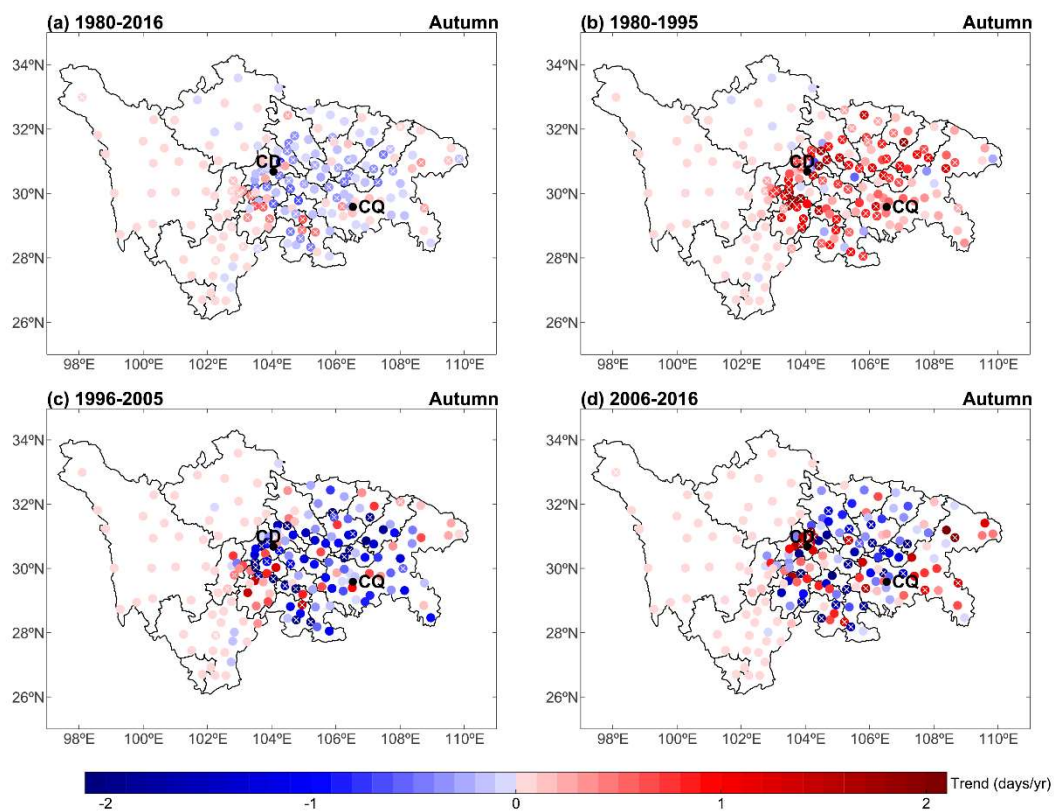

Figure S5. Same as Figure S3, but for autumn.

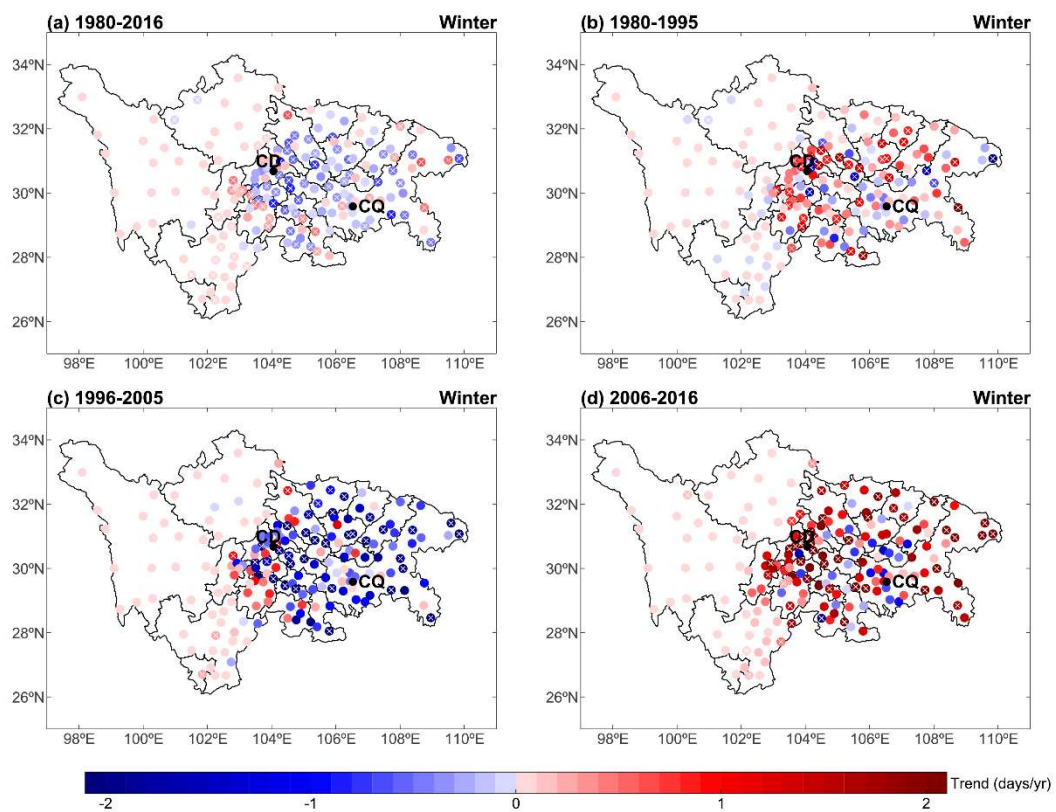

Figure S6. Same as Figure S3, but for winter.
